# Supplementary material
Source: PubMed Central journal article supplement (PMC5807158)
Supplement: NIHMS925642-supplement-supplement_1.pdf [file NIHMS925642-supplement-supplement_1.pdf]

**Supplement for:** Antenatal and neonatal antecedents of executive dysfunctions in extremely preterm children.

## Methods

The 10-year assessment and data analyses are described in the manuscript. Here we describe the antecedents we considered risk factors for the executive dysfunctions.

### *Demographic, pregnancy, and delivery variables*

After delivery, a trained research nurse interviewed each mother in her native language following a structured procedure. Following discharge, the research nurse reviewed the maternal chart using a second structured data collection form to collect information about events after admission.

Maternal report of the sequence of events leading to preterm delivery served as the primary source of information for defining the initiator of preterm delivery. The six initiators of preterm delivery (preterm labor, pre-labor rupture of the fetal membranes, placental abruption, cervical insufficiency, preeclampsia, and delivery for fetal indications) are defined elsewhere.<sup>1</sup>

A course of antenatal adrenal corticosteroids given to enhance fetal lung maturation was considered complete if the gravida received two doses of betamethasone 24 hours apart and delivered at least 48 hours after the first dose, or if she received 4 doses of dexamethasone at 12 hour intervals. Neonatal data were collected from the newborn's medical record.

### *Newborn variables*

Gestational age estimates were based on a hierarchy of the quality of available information. Most desirable were estimates based on the date of embryo retrieval or intrauterine insemination or fetal ultrasound before the 14<sup>th</sup> week (62%). When these were not available, reliance was placed sequentially on a fetal ultrasound at 14 or more weeks (29%), report of last menstrual period (LMP) without fetal ultrasound (7%), and gestational age recorded in the log of the neonatal intensive care unit (1%). The birth weight Z-score is the number of standard deviations the infant's birth weight is above or below the median weight of infants at the same gestational age in referent samples not delivered for preeclampsia or fetal indications.<sup>2,3</sup>

We collected all the physiology, laboratory and therapy data for the first 12 hours needed to calculate a SNAP-II<sup>TM</sup> score.<sup>4</sup>

Mode of ventilation was defined as the highest level of support on each day and ranged from no support, increased ambient oxygen in a hood, nasal cannula, nasal continuous positive airway pressure, and conventional mechanical ventilation to high frequency ventilation.<sup>5</sup> After the first week, this information was collected on days 7, 14, 21, and 28, and at 36 weeks post-menstruation. We did not record the specific devices used. We also recorded the number of days each infant received supplemental oxygen, CPAP, and conventional mechanical ventilation (including high frequency ventilation).

Information about blood gases after the first postnatal week was collected on days 7 and 14.<sup>6</sup> We classified the modal PaO<sub>2</sub> on postnatal days 7 and 14 as in the lowest quartile or in a

higher quartile. We also noted if the infant did not have a blood gas assessment on those days.

ELGANs were classified into three mutually exclusive respiratory dysfunction groups: those with consistently low  $\text{FiO}_2$  (an  $\text{FiO}_2 < 0.23$  on all days between 3 and 7 days of life and receiving  $\text{FiO}_2 \leq 0.25$  on Day 14), those with pulmonary deterioration (PD) (an  $\text{FiO}_2 < 0.23$  on any day between 3 and 7 days and receiving  $\text{FiO}_2 > 0.25$  on day 14), and those with early and persistent pulmonary dysfunction (EPPD) (an  $\text{FiO}_2 \geq 0.23$  on all days between 3 and 7 days of life and receiving  $\text{FiO}_2 > 0.25$  on Day 14).<sup>7</sup> For individual infants, the  $\text{FiO}_2$  assigned for each day of life was the mode  $\text{FiO}_2$  for that day. Day 0 began at the time of birth and continued through 24 hours of age. Day 1 began at the end of the first 24 hours of age and ended at midnight of that calendar day. Thus, Day 1 varies in length. Day 2 through 7 began and ended at midnight.

Documented early bacteremia was defined as recovery of an organism from blood drawn during first week, and late bacteremia as recovery of an organism from blood drawn during weeks 2, 3 or 4.<sup>8</sup> Specific organisms were not identified. A diagnosis of a tracheal infection required the recovery of a pathogen from tracheal aspirate. An infection (whether blood, trachea or CSF) was identified as clinically suspected if the culture was negative and clinician treated the baby with antibiotics for 72 or fewer hours. Presumed infections were also culture-negative, but the infant received antibiotics for more than 72 hours.

The diagnosis of PDA was assigned by clinicians without uniformity of definition. We did record when the diagnosis was confirmed by echocardiography. Diagnoses of pneumothorax, pulmonary interstitial emphysema, and pulmonary hemorrhage were those made by the clinicians caring for the ELGAN.

Medications were recorded if given on any day during the first 28 days and included methylxanthines (aminophylline, theophylline, caffeine), analgesics (i.e., morphine, fentanyl, or methadone), sedatives (i.e., lorazepam, midazolam, or chloral hydrate), and steroids (i.e., hydrocortisone and dexamethasone). We did not ask the research nurse who collected the data to identify the methylxanthine received. We subsequently confirmed that all but one of the participating centers used caffeine almost exclusively. We did not examine the dosages of any of the medications.

The newborn's chart was reviewed for receipt of blood products on post-natal days 7, 14, 21, and 28. These assessments were for those days only and not the intervening days. Thus, children who were identified as receiving a blood product definitely received a blood product, while some of those not so identified might have received a blood product during the interval between these sampling days.

After discharge, details were collected about the apparent need for respiratory care at 36 weeks post-menstrual age (PMA) along with discharge diagnoses. The diagnosis of bronchopulmonary dysplasia/chronic lung disease (BPD/BPD) was based on whether or not the child was receiving supplemental oxygenation at 36 weeks post-menstrual age. Note was also made of whether the infant was then on conventional mechanical ventilation. The child's necrotizing enterocolitis status was classified according to the modified Bell staging system.<sup>9</sup>

Participating ophthalmologists helped prepare a manual and data collection form, and then participated in efforts to minimize observer variability. Definitions of terms were those accepted by the International Committee for Classification of ROP<sup>10</sup>. In keeping with guidelines<sup>11</sup>, the first ophthalmologic examination was within the 31<sup>st</sup> to 33<sup>rd</sup> post-menstrual week. Follow-up exams were as clinically indicated until normal vascularization began in zone III.

### *Placentas*

Delivered placentas were placed in a sterile exam basin and transported to a sampling room, where they were biopsied under sterile conditions. Eighty-two percent of the samples were obtained within 1 hour of delivery. The microbiologic procedures are described in detail elsewhere,<sup>12,13</sup> as are the histologic procedures.<sup>14,15</sup>

## **Results**

Rather than go through each table individually, we grouped the findings by the executive dysfunction they are associated with.

### Working memory (WM) limitation

The prevalence of working memory limitation was higher among children whose mother identified as Black, was less than 21 years old at the time of the delivery, was not married, and was eligible for government-provided medical-care insurance then. The prevalence of working memory limitation was also higher among children with the following characteristics than among their peers: recovery of Mycoplasma from the placenta parenchyma, no antenatal corticosteroid exposure, fetal indication for delivery, fetal growth restriction, had pulmonary deterioration or early and persistent pulmonary dysfunction, received an antibiotic during the first postnatal week as well as during the next 3 weeks, and developed pneumothorax, pulmonary hemorrhage, “surgical” necrotizing enterocolitis, and severe bronchopulmonary dysplasia (*i.e.*, dependence on a mechanical ventilator as well as on supplemental oxygen). In addition, the prevalence decreased incrementally with the number of years of mother’s formal education, gestational age at birth, the lower the birth weight, and the SNAPPE II. Children whose mother sought conception assistance and children who received an antibiotic during the first postnatal week had a low prevalence.

### Inhibition-inhibition (INI) limitation

The prevalence of an inhibition-inhibition limitation was higher among children whose mother had the following characteristics than among their peers: low age at the time of delivery, smoked cigarettes during the pregnancy, periodontal infection, consumed a non-steroidal anti-inflammatory drug, and did not have fever during this pregnancy. The prevalence was also high if the infant received an antibiotic during the first postnatal week as well as later during the first month, had pulmonary hemorrhage, “surgical” necrotizing enterocolitis, and severe bronchopulmonary dysplasia. In addition, the prevalence decreased with increasing birth weight, and was reduced among those whose placenta had fetal stem vessel thrombosis, and those who had early (postnatal week #1) bacteremia, and separately, late (postnatal weeks 2-4) bacteremia.

### Inhibition-switching (INS) limitation

The prevalence of an inhibition-switching limitation was higher among children whose mother had the following characteristics than among children whose mother did not have these characteristics/exposures: self-identification as Black, low age at the time of the delivery, not married, eligible for government-provided medical-care insurance, smoked during this pregnancy, was exposed to the smoke of others, did not have fever during this pregnancy, periodontal infection, and consumed a non-steroidal anti-inflammatory drug during the pregnancy. The prevalence was also relatively high among children born before the 27<sup>th</sup> week of gestation, had fetal growth restriction, had pulmonary deterioration or early and persistent pulmonary dysfunction, high measurements of P<sub>a</sub>O<sub>2</sub> and PCO<sub>2</sub> on 2 of the first 3 postnatal days, received an antibiotic during the first postnatal week as well as later during the first month, received hydrocortisone, received a sedative, received packed cells or whole blood during 3 of the first 4 postnatal weeks, developed tracheal colonization, pneumothorax, pulmonary interstitial emphysema, pulmonary hemorrhage, “surgical” necrotizing enterocolitis, isolated intestinal perforation, retinopathy of prematurity, and severe bronchopulmonary dysplasia. The prevalence was also high among children who developed non-severe bronchopulmonary dysplasia, but not as high as among those who had severe bronchopulmonary dysplasia. In addition, the prevalence decreased incrementally with the number of years of mother’s formal education, the birth weight, while it increased with increasing SNAPPE II. Children whose mother sought conception assistance, and children who received surfactant and/or an antibiotic during the first postnatal week had a low prevalence, as did children who had early and/or late bacteremia.

### Executive dysfunction composite (*i.e.*, Z-score $\leq -1$ on all 3 assessments)

The prevalence of the executive dysfunction composite (identified as “All” at the top of the column before “Row total”) was higher among children whose mother had the following characteristics than among children whose mother did not have these characteristics/exposures: self-identification as Black, low age at the time of the delivery, not married, did not graduate from college (or equivalent) eligible for government-provided medical-care insurance, less than one year since previous pregnancy, was not trying to get pregnant, did not have fever during this pregnancy, had a periodontal infection, did not consume any medication, and consumed a non-steroidal anti-inflammatory drug during the pregnancy (*these 2 population characteristics really are compatible*). The prevalence was also high among children whose placenta harbored multiple organisms, including Mycoplasma species and normal vaginal flora, and among children delivered for fetal indications, were not exposed to antenatal magnesium, were born before the 27<sup>th</sup> week of gestation, had a high SNAPPE-II, high measurements of P<sub>a</sub>O<sub>2</sub> on 2 of the first 3 postnatal days, and received an antibiotic during the first postnatal week. The prevalence was low among children whose mother sought conception assistance, or consumed aspirin during the pregnancy, or if the newborn was exposed to postnatal dexamethasone, and/or had early bacteremia.

**Supplement table 1.** Children classified by whether or not they had Z-scores  $\leq -1$  on each of three assessments of capabilities considered part of executive function.

| <b>Working Memory</b> | <b>Inhibition Inhibition</b> | <b>Inhibition Switching</b> | <b>N</b> | <b>Description</b>               |
|-----------------------|------------------------------|-----------------------------|----------|----------------------------------|
| <b>Isolated</b>       |                              |                             |          |                                  |
| $\leq -1$             |                              |                             | 19       | Isolated Working Memory          |
|                       | $\leq -1$                    |                             | 97       | Isolated Inhibition Inhibition   |
|                       |                              | $\leq -1$                   | 79       | Isolated Inhibition Switching    |
|                       |                              |                             | 230      | Referent (no Z-score $\leq -1$ ) |
| <b>Sets of 2</b>      |                              |                             |          |                                  |
| $\leq -1$             |                              | $\leq -1$                   | 28       |                                  |
| $\leq -1$             | $\leq -1$                    |                             | 15       |                                  |
|                       | $\leq -1$                    | $\leq -1$                   | 141      |                                  |
| <b>All</b>            |                              |                             |          |                                  |
| All $\leq -1$         |                              |                             | 169      | All Working Memory               |
|                       | All $\leq -1$                |                             | 360      | All Inhibition Inhibition        |
|                       |                              | All $\leq -1$               | 355      | All Inhibition Switching         |
| $\leq -1$             | $\leq -1$                    | $\leq -1$                   | 107      | All 3                            |

**Supplement table 2.** Row percents of maternal demographic characteristics of children classified by a Z-score  $\leq -1$  on the executive dysfunction listed at the top of each column.

| Maternal characteristic             |                     | Executive dysfunction |     |     |     | Row total |
|-------------------------------------|---------------------|-----------------------|-----|-----|-----|-----------|
|                                     |                     | WM                    | INI | INS | All |           |
| "Racial" identity                   | White               | 18                    | 45  | 44  | 10  | 480       |
|                                     | Black               | 39                    | 37  | 71  | 29  | 163       |
|                                     | Other               | 27                    | 47  | 39  | 15  | 71        |
| Hispanic                            | Yes                 | 29                    | 52  | 54  | 17  | 65        |
|                                     | No                  | 23                    | 50  | 49  | 15  | 649       |
| Maternal age, Years                 | < 21                | 33                    | 60  | 61  | 22  | 89        |
|                                     | 21-35               | 23                    | 49  | 49  | 14  | 473       |
|                                     | > 35                | 20                    | 48  | 44  | 14  | 154       |
| Years of Education                  | $\leq 12$ (HS)      | 32                    | 58  | 60  | 20  | 273       |
|                                     | >12 to <16          | 25                    | 45  | 52  | 17  | 169       |
|                                     | $\geq 16$ (College) | 15                    | 46  | 38  | 8   | 274       |
| Single?                             | Yes                 | 34                    | 57  | 63  | 24  | 270       |
|                                     | No                  | 17                    | 46  | 42  | 10  | 416       |
| Self supported?                     | Yes                 | 21                    | 48  | 47  | 13  | 484       |
|                                     | No                  | 28                    | 50  | 56  | 18  | 222       |
| Public insurance                    | Yes                 | 32                    | 58  | 61  | 22  | 225       |
|                                     | No                  | 20                    | 47  | 44  | 12  | 491       |
| Pre-pregnancy Body Mass Index (BMI) | <18.5               | 28                    | 53  | 45  | 19  | 53        |
|                                     | 18.5,<25            | 19                    | 47  | 47  | 12  | 354       |
|                                     | 25,<30              | 27                    | 54  | 52  | 19  | 135       |
|                                     | >30                 | 27                    | 52  | 55  | 15  | 148       |
| <b>Total row percent</b>            |                     | 24                    | 50  | 50  | 15  |           |
| <b>Maximum column N</b>             |                     | 169                   | 360 | 355 | 107 | 716       |

**Supplement table 2a.** Row percents of maternal socio-demographic characteristics. This table documents the inter-relatedness of these socio-demographic characteristics

|                    |                | Government-provided insurance |    |        |     | Row N |
|--------------------|----------------|-------------------------------|----|--------|-----|-------|
|                    |                | Yes                           |    | No     |     |       |
|                    |                | Single                        |    | Single |     |       |
|                    |                | Yes                           | No | Yes    | No  |       |
| "Racial" identity  | White          | 14                            | 5  | 10     | 71  | 480   |
|                    | Black          | 49                            | 10 | 21     | 20  | 163   |
|                    | Other          | 47                            | 8  | 10     | 38  | 71    |
| Years of Education | ≤12 (HS)       | 51                            | 9  | 13     | 27  | 273   |
|                    | >12 to <16     | 21                            | 8  | 18     | 53  | 169   |
|                    | ≥ 16 (College) | 3                             | 2  | 9      | 87  | 274   |
| Colum N            |                | 180                           | 48 | 90     | 401 | 716   |

**Supplement table 3.** Row percents of maternal pregnancy characteristics of children classified by which executive dysfunction(s) they had.

| Exposures and characteristics   |     | Executive dysfunction |     |     |     | Row total |
|---------------------------------|-----|-----------------------|-----|-----|-----|-----------|
|                                 |     | WM                    | INI | INS | ALL |           |
| Smoked during pregnancy         | Yes | 24                    | 60  | 56  | 14  | 93        |
|                                 | No  | 23                    | 48  | 48  | 15  | 609       |
| Passive smoke exposure          | Yes | 28                    | 59  | 61  | 19  | 165       |
|                                 | No  | 22                    | 47  | 46  | 14  | 533       |
| 1 <sup>st</sup> pregnancy       | Yes | 26                    | 49  | 49  | 16  | 300       |
|                                 | No  | 22                    | 51  | 50  | 14  | 400       |
| Years since last pregnancy      | < 1 | 29                    | 56  | 53  | 21  | 75        |
|                                 | 1-2 | 18                    | 50  | 48  | 9   | 113       |
|                                 | 2+  | 22                    | 49  | 50  | 14  | 208       |
| Conceived using birth control   | Yes | 29                    | 50  | 53  | 19  | 103       |
|                                 | No  | 23                    | 50  | 48  | 14  | 595       |
| Trying to get pregnant          | Yes | 19                    | 45  | 45  | 11  | 408       |
|                                 | No  | 30                    | 57  | 55  | 21  | 292       |
| Conception assistance           | Yes | 16                    | 43  | 38  | 9   | 171       |
|                                 | No  | 26                    | 52  | 53  | 17  | 529       |
| Due date changed                | Yes | 25                    | 54  | 53  | 14  | 135       |
|                                 | No  | 23                    | 49  | 48  | 15  | 560       |
| <b>Illnesses this pregnancy</b> |     |                       |     |     |     |           |
| Fever                           | Yes | 19                    | 35  | 40  | 7   | 43        |
|                                 | No  | 24                    | 51  | 50  | 15  | 656       |
| Vaginal/cervical infection      | Yes | 22                    | 53  | 51  | 15  | 96        |
|                                 | No  | 24                    | 49  | 49  | 15  | 603       |
| Urinary tract infection         | Yes | 24                    | 47  | 54  | 18  | 98        |
|                                 | No  | 22                    | 50  | 49  | 14  | 601       |
| Peridontal                      | Yes | 30                    | 80  | 80  | 20  | 10        |
|                                 | No  | 24                    | 49  | 49  | 15  | 689       |
| <b>Medications</b>              |     |                       |     |     |     |           |
| Any medication                  | Yes | 24                    | 49  | 49  | 14  | 618       |
|                                 | No  | 31                    | 60  | 52  | 20  | 81        |
| Aspirin*                        | Yes | 23                    | 49  | 41  | 10  | 39        |
|                                 | No  | 24                    | 50  | 50  | 15  | 658       |
| NSAID*                          | Yes | 27                    | 67  | 61  | 20  | 49        |
|                                 | No  | 23                    | 49  | 48  | 14  | 648       |
| Acetaminophen*                  | Yes | 19                    | 49  | 48  | 12  | 371       |
|                                 | No  | 29                    | 51  | 51  | 18  | 326       |
| Antibiotic*                     | Yes | 25                    | 46  | 52  | 14  | 208       |
|                                 | No  | 23                    | 52  | 48  | 15  | 490       |
| <b>Total row percent</b>        |     |                       | 24  | 50  | 49  | 15        |
| <b>Maximum column N</b>         |     |                       | 165 | 351 | 347 | 103       |
|                                 |     |                       |     |     |     | 702       |

\* infants may be in more than one category



**Supplement table 4.** Row percents of placenta characteristics of four groups of children classified by which learning limitations they had.

| Placenta characteristics                    |     | Executive dysfunction |     |     |     | Row total |
|---------------------------------------------|-----|-----------------------|-----|-----|-----|-----------|
|                                             |     | WM                    | INI | INS | ALL |           |
| # of species isolated                       | 0   | 24                    | 49  | 51  | 15  | 329       |
|                                             | 1   | 20                    | 47  | 47  | 14  | 167       |
|                                             | ≥ 2 | 29                    | 55  | 53  | 20  | 154       |
| Aerobe                                      | Yes | 26                    | 53  | 53  | 18  | 208       |
|                                             | No  | 23                    | 48  | 48  | 15  | 442       |
| Anaerobe                                    | Yes | 23                    | 51  | 47  | 17  | 182       |
|                                             | No  | 25                    | 50  | 52  | 15  | 468       |
| Mycoplasma                                  | Yes | 33                    | 56  | 59  | 20  | 64        |
|                                             | No  | 23                    | 49  | 49  | 15  | 586       |
| Skin organisms*                             | Yes | 21                    | 49  | 43  | 15  | 124       |
|                                             | No  | 25                    | 50  | 52  | 16  | 526       |
| Vaginal organisms†                          | Yes | 29                    | 54  | 49  | 21  | 108       |
|                                             | No  | 23                    | 49  | 51  | 15  | 542       |
| <b>Total row percent</b>                    |     | 24                    | 50  | 50  | 15  |           |
| <b>Maximum column N</b>                     |     | 157                   | 324 | 327 | 103 | 650       |
|                                             |     |                       |     |     |     |           |
| Chorionic plate inflammation <sup>1</sup>   | Yes | 25                    | 56  | 49  | 18  | 128       |
|                                             | No  | 23                    | 47  | 49  | 14  | 527       |
| Chorion/decidua inflammation <sup>2</sup>   | Yes | 25                    | 51  | 49  | 16  | 228       |
|                                             | No  | 23                    | 47  | 49  | 14  | 426       |
| Fetal stem vessel infiltration <sup>3</sup> | Yes | 22                    | 51  | 50  | 16  | 163       |
|                                             | No  | 24                    | 48  | 49  | 14  | 489       |
| Umbilical cord vasculitis                   | Yes | 26                    | 54  | 50  | 17  | 111       |
|                                             | No  | 22                    | 49  | 48  | 14  | 534       |
| Fetal stem vessel Thrombosis                | Yes | 27                    | 39  | 52  | 15  | 33        |
|                                             | No  | 23                    | 50  | 49  | 15  | 618       |
| Infarct                                     | Yes | 21                    | 49  | 49  | 14  | 118       |
|                                             | No  | 24                    | 50  | 49  | 15  | 541       |
| Increased syncytial Knots                   | Yes | 29                    | 50  | 48  | 18  | 135       |
|                                             | No  | 22                    | 49  | 49  | 14  | 527       |
| Decidual hemorrhage/ fibrin deposition      | Yes | 22                    | 46  | 47  | 15  | 110       |
|                                             | No  | 24                    | 50  | 50  | 15  | 541       |
| <b>Total row percent</b>                    |     | 24                    | 49  | 49  | 15  |           |
| <b>Maximum column N</b>                     |     | 156                   | 327 | 324 | 97  | 662       |

\* *Corynebacterium sp, Propionebacterium sp, Staphylococcus sp*

† *Prevotella bivia, Lactobacillus sp, Peptostrep magnus, Gardnerella vaginalis*

<sup>1</sup> stage 3 and severity 3

<sup>2</sup> grades 3 and 4

<sup>3</sup> grades 3, 4 and 5

**Supplement table 5.** Row percents of delivery characteristics of four groups of children classified by which executive dysfunction(s) they had.

| Pregnancy characteristic            |                        | Executive dysfunction |     |     |     | Row total |
|-------------------------------------|------------------------|-----------------------|-----|-----|-----|-----------|
|                                     |                        | WM                    | INI | INS | ALL |           |
| Antenatal steroid course            | Complete               | 23                    | 51  | 50  | 15  | 450       |
|                                     | Partial                | 19                    | 47  | 50  | 13  | 183       |
|                                     | None                   | 35                    | 54  | 49  | 18  | 83        |
| Pregnancy complication              | PTL                    | 22                    | 49  | 46  | 13  | 328       |
|                                     | pPROM                  | 24                    | 52  | 51  | 17  | 157       |
|                                     | PE                     | 26                    | 51  | 57  | 17  | 90        |
|                                     | Abruption              | 25                    | 52  | 51  | 12  | 84        |
|                                     | Cervical Insufficiency | 19                    | 50  | 50  | 16  | 32        |
|                                     | Fetal Indication       | 40                    | 48  | 56  | 24  | 25        |
| Magnesium sulfate                   | None                   | 26                    | 59  | 53  | 20  | 225       |
|                                     | Tocolysis              | 22                    | 46  | 48  | 13  | 397       |
|                                     | Seizure prophylaxis    | 26                    | 46  | 51  | 13  | 89        |
| Cesarean                            | Yes                    | 25                    | 49  | 49  | 15  | 482       |
|                                     | No                     | 20                    | 53  | 50  | 15  | 234       |
| Duration of labor, hours            | 0                      | 26                    | 47  | 54  | 16  | 163       |
|                                     | ≤ 12                   | 26                    | 51  | 48  | 18  | 166       |
|                                     | > 12                   | 21                    | 52  | 48  | 13  | 387       |
| Duration of membrane rupture, hours | < 1                    | 25                    | 49  | 52  | 15  | 416       |
|                                     | 1-24                   | 26                    | 53  | 44  | 15  | 121       |
|                                     | > 24                   | 20                    | 51  | 47  | 15  | 179       |
| Fever*                              | Yes                    | 17                    | 54  | 54  | 14  | 35        |
|                                     | No                     | 23                    | 50  | 50  | 15  | 657       |
| Highest WBC*                        | Yes                    | 28                    | 49  | 49  | 16  | 144       |
|                                     | No                     | 22                    | 51  | 50  | 15  | 558       |
| <b>Total row percent</b>            |                        | 24                    | 50  | 50  | 15  |           |
| <b>Maximum column N</b>             |                        | 169                   | 360 | 355 | 107 | 716       |

\* within the interval from before delivery to 48 hours post delivery

**Supplement table 6.** Row percents of characteristics at the time delivery of four groups of children classified by which executive dysfunction(s) they had.

| Characteristic of the infant |            | Executive dysfunction |     |     |     | Row total |
|------------------------------|------------|-----------------------|-----|-----|-----|-----------|
|                              |            | WM                    | INI | INS | ALL |           |
| Sex                          | Male       | 24                    | 49  | 48  | 16  | 342       |
|                              | Female     | 23                    | 51  | 51  | 14  | 374       |
| Multiple gestation           | Yes        | 23                    | 48  | 47  | 13  | 255       |
|                              | No         | 24                    | 52  | 51  | 16  | 461       |
| Gestational age, Weeks       | 23-24      | 30                    | 50  | 55  | 18  | 127       |
|                              | 25-26      | 25                    | 50  | 53  | 17  | 327       |
|                              | 27         | 19                    | 50  | 43  | 11  | 262       |
| Birth weight, grams          | ≤750       | 29                    | 56  | 56  | 19  | 236       |
|                              | 751-1000   | 22                    | 49  | 50  | 14  | 325       |
|                              | > 1000     | 18                    | 43  | 37  | 10  | 155       |
| Birth weight Z-score*        | < -2       | 40                    | 58  | 65  | 20  | 40        |
|                              | ≥ -2, < -1 | 26                    | 50  | 50  | 17  | 90        |
|                              | ≥ -1       | 22                    | 50  | 48  | 14  | 586       |
| Head Circumference Z-score*  | < -2       | 35                    | 67  | 58  | 21  | 48        |
|                              | ≥ -2, < -1 | 31                    | 51  | 53  | 21  | 154       |
|                              | ≥ -1       | 20                    | 49  | 48  | 12  | 483       |
| <b>Total row percent</b>     |            | 24                    | 50  | 50  | 15  |           |
| <b>Maximum column N</b>      |            | 169                   | 360 | 355 | 107 | 716       |

\* External standard (Yudkin et al., 1987)

**Supplement table 7.** Row percents of postnatal characteristics of four groups of children classified by which executive dysfunction(s) they had.

| Postnatal factor                                             |         | Executive dysfunction |     |     |     | Row total |
|--------------------------------------------------------------|---------|-----------------------|-----|-----|-----|-----------|
|                                                              |         | WM                    | INI | INS | ALL |           |
| SNAPPE-II                                                    | < 30    | 18                    | 49  | 43  | 12  | 310       |
|                                                              | 30-44   | 24                    | 47  | 51  | 14  | 230       |
|                                                              | 45+     | 33                    | 58  | 61  | 22  | 163       |
| Lowest Q lowest MAP <sup>§</sup>                             | Yes     | 26                    | 50  | 52  | 14  | 145       |
|                                                              | No      | 23                    | 50  | 48  | 15  | 558       |
| Vasopressor <sup>¶</sup>                                     | Yes     | 24                    | 52  | 52  | 13  | 147       |
|                                                              | No      | 23                    | 50  | 49  | 15  | 569       |
| Highest Q MAP variability <sup>†</sup>                       | Yes     | 22                    | 52  | 45  | 15  | 159       |
|                                                              | No      | 24                    | 49  | 50  | 15  | 544       |
| Lowest Q lowest P <sub>a</sub> O <sub>2</sub> <sup>*</sup>   | Yes     | 24                    | 45  | 53  | 15  | 119       |
|                                                              | No      | 24                    | 52  | 52  | 14  | 464       |
| Highest Q highest P <sub>a</sub> O <sub>2</sub> <sup>*</sup> | Yes     | 30                    | 58  | 65  | 20  | 122       |
|                                                              | No      | 22                    | 49  | 46  | 13  | 461       |
| Lowest Q lowest PCO <sub>2</sub> <sup>*</sup>                | Yes     | 24                    | 58  | 57  | 19  | 123       |
|                                                              | No      | 24                    | 49  | 48  | 13  | 460       |
| Highest Q highest PCO <sub>2</sub> <sup>*</sup>              | Yes     | 24                    | 54  | 62  | 15  | 133       |
|                                                              | No      | 24                    | 50  | 46  | 14  | 450       |
| Lowest Q lowest pH <sup>*</sup>                              | Yes     | 22                    | 48  | 54  | 14  | 125       |
|                                                              | No      | 24                    | 52  | 49  | 15  | 458       |
| Lowest Q P <sub>a</sub> O <sub>2</sub> day 7                 | Yes     | 17                    | 34  | 55  | 10  | 58        |
|                                                              | No      | 23                    | 55  | 55  | 14  | 235       |
|                                                              | Unknown | 25                    | 50  | 46  | 16  | 423       |
| Lowest Q P <sub>a</sub> O <sub>2</sub> day 14                | Yes     | 22                    | 42  | 53  | 11  | 36        |
|                                                              | No      | 22                    | 55  | 55  | 15  | 121       |
|                                                              | Unknown | 24                    | 50  | 48  | 15  | 559       |
| Tracheal colonization <sup>††</sup>                          | Yes     | 25                    | 52  | 60  | 12  | 138       |
|                                                              | No      | 23                    | 50  | 47  | 15  | 575       |
| Early bacteremia (wk 1) <sup>††</sup>                        | Yes     | 19                    | 38  | 38  | 7   | 42        |
|                                                              | No      | 24                    | 51  | 50  | 15  | 673       |
| Late bacteremia (wks 2-4) <sup>††</sup>                      | Yes     | 24                    | 48  | 46  | 14  | 442       |
|                                                              | No      | 23                    | 55  | 56  | 15  | 269       |
| Mech ventilation, day 7 <sup>MV</sup>                        | Yes     | 25                    | 50  | 52  | 15  | 412       |
|                                                              | No      | 22                    | 51  | 46  | 16  | 303       |
| Mech ventilation, day 14 <sup>MV</sup>                       | Yes     | 26                    | 51  | 55  | 16  | 392       |
|                                                              | No      | 21                    | 50  | 44  | 13  | 319       |
| Mech ventilation, day 21 <sup>MV</sup>                       | Yes     | 27                    | 53  | 57  | 17  | 381       |
|                                                              | No      | 20                    | 47  | 41  | 13  | 326       |
| Mech ventilation, day 28 <sup>MV</sup>                       | Yes     | 28                    | 53  | 55  | 18  | 321       |
|                                                              | No      | 20                    | 49  | 46  | 13  | 377       |
| <b>Total row percent</b>                                     |         | 24                    | 50  | 50  | 15  |           |
| <b>Maximum column N</b>                                      |         | 169                   | 360 | 355 | 107 | 716       |

- § Lowest MAP: lowest MAP recorded in the first 24 hours, in the lowest quartile for gestational age
- ¶ Vasopressor: treatment for hypotension in the first 24 hours, using any vasopressor (dopamine, dobutamine, epinephrine)
- † Labile MAP: labile blood pressure, defined as the upper quartile of the difference in the lowest and highest MAP
- \* extreme quartile for gestational age on two of the first three postnatal days
- †† Definite, i.e., culture proven
- MV Includes conventional mechanical ventilation and high frequency ventilation

**Supplement table 8.** Row percents of medications administered during the first postnatal month to four groups of children classified by which executive dysfunction(s) they had.

| Medications and therapies |     | Executive dysfunction |     |     |     | Row total |
|---------------------------|-----|-----------------------|-----|-----|-----|-----------|
|                           |     | WM                    | INI | INS | ALL |           |
| Surfactant, week 1        | Yes | 24                    | 50  | 50  | 14  | 630       |
|                           | No  | 23                    | 56  | 49  | 19  | 86        |
| Methylxanthine, 15+ days  | Yes | 22                    | 50  | 45  | 15  | 453       |
|                           | No  | 26                    | 51  | 58  | 14  | 263       |
| Any hydrocortisone        | Yes | 28                    | 52  | 60  | 17  | 86        |
|                           | No  | 23                    | 50  | 48  | 15  | 630       |
| Any dexamethasone         | Yes | 20                    | 54  | 48  | 9   | 54        |
|                           | No  | 24                    | 50  | 50  | 15  | 662       |
| Any analgesic             | Yes | 24                    | 50  | 51  | 16  | 482       |
|                           | No  | 22                    | 50  | 47  | 13  | 234       |
| Any sedative              | Yes | 25                    | 50  | 60  | 16  | 177       |
|                           | No  | 23                    | 50  | 46  | 14  | 539       |
| PDA treatment             | Yes | 23                    | 51  | 50  | 14  | 416       |
|                           | No  | 24                    | 49  | 49  | 16  | 300       |
| Transfusion †             | Yes | 25                    | 51  | 54  | 16  | 382       |
|                           | No  | 22                    | 50  | 44  | 13  | 333       |
| Antibiotic, week 1        | Yes | 24                    | 51  | 50  | 15  | 699       |
|                           | No  | 12                    | 29  | 41  | 0   | 17        |
| Antibiotic, week 2-4      | Yes | 25                    | 53  | 52  | 16  | 537       |
|                           | No  | 19                    | 42  | 41  | 12  | 177       |
| <b>Total row percent</b>  |     | 24                    | 50  | 50  | 15  |           |
| <b>Maximum column N</b>   |     | 169                   | 360 | 355 | 107 | 716       |

† packed cells or whole blood during 3 of the first 4 postnatal weeks

**Supplement table 9.** Row percents of postnatal characteristics and diagnoses of four groups of children classified by which executive dysfunction(s) they had.

| Diagnostic & classification entities   |                            | Executive dysfunction |     |     |     | Row total |
|----------------------------------------|----------------------------|-----------------------|-----|-----|-----|-----------|
|                                        |                            | WM                    | INI | INS | ALL |           |
| Lowest quartile growth velocity        | Yes                        | 23                    | 50  | 52  | 10  | 160       |
|                                        | No                         | 24                    | 51  | 50  | 17  | 535       |
| Patent ductus arteriosus               | Yes                        | 24                    | 51  | 49  | 15  | 468       |
|                                        | No                         | 23                    | 49  | 50  | 16  | 248       |
| Pneumothorax                           | Yes                        | 31                    | 48  | 61  | 17  | 54        |
|                                        | No                         | 23                    | 50  | 49  | 15  | 662       |
| Pulmonary interstitial Emphysema       | Yes                        | 27                    | 46  | 61  | 16  | 106       |
|                                        | No                         | 23                    | 51  | 48  | 15  | 610       |
| Pulmonary hemorrhage                   | Yes                        | 33                    | 71  | 71  | 25  | 24        |
|                                        | No                         | 23                    | 50  | 49  | 15  | 692       |
| Respiratory group classification       | EPPD <sup>†</sup>          | 24                    | 51  | 53  | 12  | 276       |
|                                        | PD <sup>††</sup>           | 27                    | 51  | 54  | 19  | 264       |
|                                        | Low FiO <sub>2</sub>       | 18                    | 49  | 39  | 13  | 156       |
| Necrotizing enterocolitis (Bell stage) | < IIIb                     | 23                    | 50  | 49  | 14  | 674       |
|                                        | IIIb                       | 43                    | 65  | 56  | 35  | 23        |
|                                        | Isolated perf <sup>P</sup> | 21                    | 47  | 58  | 16  | 19        |
| ROP: stage                             | 3-5                        | 24                    | 49  | 55  | 15  | 117       |
|                                        | < 3                        | 23                    | 51  | 47  | 15  | 528       |
| ROP: plus disease                      | Yes                        | 27                    | 53  | 58  | 17  | 59        |
|                                        | No                         | 23                    | 50  | 49  | 15  | 646       |
| ROP: pre-threshold <sup>††</sup>       | Yes                        | 24                    | 53  | 58  | 16  | 74        |
|                                        | No                         | 23                    | 50  | 49  | 15  | 631       |
| BPD/CLD                                | Severe <sup>S</sup>        | 32                    | 60  | 75  | 25  | 53        |
|                                        | Mild/Moderate <sup>M</sup> | 25                    | 48  | 53  | 14  | 285       |
|                                        | No                         | 21                    | 51  | 43  | 14  | 371       |
| <b>Total row percent</b>               |                            | 24                    | 50  | 50  | 15  |           |
| <b>Maximum column N</b>                |                            | 169                   | 360 | 355 | 107 | 716       |

<sup>V</sup> Alone or with other lesions

<sup>\*</sup>  $1000 \cdot ((wt_{28} - wt_7) / wt_7) / 21$ ; units: g/kg/day

<sup>§</sup> Pulmonary interstitial emphysema

<sup>†</sup> Early and persistent pulmonary dysfunction

<sup>††</sup> Pulmonary deterioration

<sup>S</sup> On ventilator as well as oxygen at 36 weeks post-menstrual age

<sup>M</sup> On oxygen, but not on ventilator at 36 weeks post-menstrual age

<sup>§§</sup> Includes less severe disease

<sup>P</sup> Isolated intestinal perforation

<sup>††</sup> Satisfied ET-ROP criteria for ablative surgery (pre-threshold disease)

## References

1. McElrath TF, Hecht JL, Dammann O, et al. Pregnancy disorders that lead to delivery before the 28th week of gestation: an epidemiologic approach to classification. . *Am J Epidemiol* 2008;168:980-9.
2. Yudkin PL, Aboualfa M, Eyre JA, Redman CW, Wilkinson AR. New birthweight and head circumference centiles for gestational ages 24 to 42 weeks. *Early Hum Dev* 1987;15:45-52.
3. Leviton A, Paneth N, Reuss ML, et al. Maternal infection, fetal inflammatory response, and brain damage in very low birthweight infants. *Pediatric Research* 1999;46:566-75.
4. Richardson DK, Corcoran JD, Escobar GJ, Lee SK. SNAP-II and SNAPPE-II: Simplified newborn illness severity and mortality risk scores. *J Pediatr* 2001;138:92-100.
5. Bose C, Van Marter LJ, Laughon M, et al. Fetal growth restriction and chronic lung disease among infants born before the 28th week of gestation. *Pediatrics* 2009;124:e450-6.
6. Leviton A, Allred EN, Paneth N, et al. Early blood gas abnormalities and the preterm brain. *Am J Epidemiology* 2010;172:907-16.
7. Laughon M, Allred EN, Bose C, et al. Patterns of Respiratory Disease during the First Two Post-natal Weeks in Extremely Premature Infants. *Pediatrics* 2009;123:1124-31.
8. Patel S, Dammann O, Martin CR, Allred EN, Leviton A, for the ESI. Presumed and definite bacteremia in extremely low gestational age newborns. *Acta Paediatr* 2011;100:36-41.
9. Kliegman RM, Walsh MC. Neonatal necrotizing enterocolitis: pathogenesis, classification, and spectrum of illness. *Curr Probl Pediatr* 1987;17:213-88.
10. Prematurity. TCftCoRo. An international classification of retinopathy of prematurity. . *Arch Ophthalmol* 1984;102:1130-4.
11. Screening examination of premature infants for retinopathy of prematurity. *Pediatrics* 2001;108:809-11.
12. Onderdonk AB, Hecht JL, T.F. M, et al. Colonization of second-trimester placenta parenchyma. *Am J Obstet Gynecol* 2008;199:52.e1-.e10.
13. Onderdonk AB, Delaney ML, DuBois AM, Allred EN, Leviton A. Detection of bacteria in placental tissues obtained from extremely low gestational age neonates. *Am J Obstet Gynecol* 2008;198:110 e1-7.
14. Hecht JL, Allred EN, Kliman HJ, et al. Histological characteristics of singleton placentas delivered before the 28th week of gestation. *Pathology* 2008;40:372-6.
15. Hecht JL, Onderdonk A, Delaney M, et al. Characterization of chorioamnionitis in 2nd-trimester C-section placentas and correlation with microorganism recovery from subamniotic tissues. *Pediatr Dev Pathol* 2008;11:15-22.
